# Supplementary material
Source: HighWire-hosted journal article supplement (https://ajnr-sso.highwirestaging.com/highwire/filestream/107773/field_highwire_adjunct_files/0/Revised_manuscript_without_highlight.pdf)
Supplement: Revised_manuscript_without_highlight.pdf [file Revised_manuscript_without_highlight.pdf]

# Tumor embolization via the meningohypophyseal and inferolateral trunk in patients with skull-based tumors by using the distal balloon protection technique

Kei Yamashiro, Motoharu Hayakawa, Kazuhide Adachi, Mitsuhiro Hasegawa, and Yuichi Hirose

## ABSTRACT

**BACKGROUND AND PURPOSE:** Tumor embolization through the meningohypophyseal trunk and inferolateral trunk is known to be effective in skull-based tumors; however, microcatheter cannulation into these arteries is difficult, and the number of cases that can be safely embolized is limited. In this study, we present a novel embolization procedure for meningohypophyseal trunk and inferolateral trunk using the distal balloon protection technique and detail its clinical efficacy and complication risks. We developed this procedure to allow safe embolization in patients who cannot be adequately cannulated with microcatheters into these arteries.

**MATERIALS AND METHODS:** Patients who underwent meningohypophyseal trunk or inferolateral trunk embolization using the distal balloon protection technique for skull-based tumors at our institution between 2010 and 2023 were included. In this procedure, the ICA was temporarily occluded with a balloon at the ophthalmic artery bifurcation, the microcatheter was guided to the meningohypophyseal trunk or inferolateral trunk vicinity, and embolic particles were injected into the arteries. The balloon was deflated after the embolic particles, that had refluxed into the ICA, were aspirated.

**RESULTS:** A total of 25 meningohypophyseal trunks and inferolateral trunks were embolized during 21 surgeries. Of these 25 arteries, only nine (36.0%) were successfully cannulated with microcatheters. Nevertheless, effective embolization was achieved in all cases. Permanent complications occurred in only one case (4.8%), in which the central retinal artery was occluded during inferolateral trunk embolization, resulting in a visual field defect. No permanent complications resulting from the embolic cerebral infarction were observed. Of 16 cases that underwent MRI within a week after embolization, however, 11 (68.8%) demonstrated embolic cerebral infarctions.

**CONCLUSIONS:** In patients with skull-based tumors with meningohypophyseal trunk or inferolateral trunk feeders that cannot be catheterized directly, embolization using the distal balloon protection technique for tumor supply can be considered as a salvage technique.

**ABBREVIATIONS:** MHT = meningohypophyseal trunk; ILT = inferolateral trunk; GC = guide catheter; AC = aspiration catheter; FR = flow reverse

Received month day, year; accepted after revision month day, year.

From the Department of Neurosurgery (K.Y., M.H.), Fujita Health University Okazaki Medical Center, Okazaki, Aichi, Japan; Department of Neurosurgery (K.A., Y.H.), Fujita Health University, Toyoake, Aichi, Japan; Tokyo D-tower Hospital (M.H.), Tokyo, Japan.

The authors declare no conflicts of interest related to the content of this article.

Please address correspondence to Kei Yamashiro, PhD, Department of Neurosurgery, Fujita Health University Okazaki Medical Center, 1, Gotanda, Harisaki-cho, Okazaki City, Aichi 4440827, Japan; e-mail: ykei@fujita-hu.ac.jp or keiyamashiro1577@gmail.com

## SUMMARY SECTION

**PREVIOUS LITERATURE:** Tumor embolization through the meningohypophyseal trunk and inferolateral trunk is known to be effective in skull-based tumors; however, microcatheter cannulation into these arteries is difficult, and the number of cases that can be safely embolized is limited. In this study, we present a novel embolization procedure for meningohypophyseal trunk and inferolateral trunk using the distal balloon protection technique and detail its clinical efficacy and complication risks. We developed this procedure to allow safe embolization in patients who cannot be adequately cannulated with microcatheters into these arteries.

**KEY FINDINGS:** A total of 25 meningohypophyseal trunks and inferolateral trunks were embolized during 21 surgeries, and only nine (36.0%) were successfully cannulated with microcatheters. Nevertheless, effective embolization was achieved in all cases. Permanent complications occurred in one case (4.8%), and postoperative embolic cerebral infarctions occurred with high frequency.

**KNOWLEDGE ADVANCEMENT:** In patients with skull-based tumors with meningohypophyseal trunk or inferolateral trunk feeders that cannot be catheterized directly, embolization using the distal balloon protection technique for tumor supply can be considered as a salvage technique.

## INTRODUCTION

Preoperative embolization is known to be effective against extra-axial tumors and is a widely accepted procedure.<sup>1-11</sup> It is known that preoperative tumor embolization is particularly effective for skull-based tumors because tumor-feeding arteries are located at the deepest part of the surgical field, making devascularization of feeding arteries difficult until the tumor has been removed.<sup>2, 7, 8, 12</sup>

1 However, preoperative embolization of skull-based tumors presents several challenges.<sup>13</sup> In particular, when embolizing the  
2 meningohypophyseal trunk (MHT) and inferolateral trunk (ILT), reflux of embolic particles into the ICA has been reported.<sup>2,4,7,10</sup> This is  
3 because the MHT and ILT are usually very tortuous, making microcatheter cannulation into these arteries difficult.<sup>2,8</sup> When MHT and ILT  
4 are aggressively embolized, neurological complications are reported to occur in 22.1% and 13.3% of cases, respectively.<sup>9</sup> On the other  
5 hand, MHT and ILT embolization are safe provided that cannulation is performed reliably,<sup>4,7,8,10</sup> although the number of patients who  
6 can be adequately catheterized into the MHT and ILT is limited. In a report of skull-based meningioma embolization with safety being the  
7 highest priority, only nine of 28 MHTs (32.1%) and one of five ILTs (20.0%) were embolized,<sup>10</sup> indicating that safe tumor embolization  
8 via these arteries can only be performed in a limited number of cases.

9 To solve this problem, we developed a novel embolization procedure that combines a distal balloon protection technique.<sup>2</sup> In this  
10 procedure, the MHT and ILT are embolized while occluding the ICA with a balloon, and embolic particles that have refluxed into the ICA  
11 are aspirated and removed. This technique allows embolization of the MHT and ILT even if they are difficult to cannulate using  
12 microcatheters. Our current report explores the efficacy and safety of MHT and ILT embolization using the distal balloon protection  
13 technique.

## 14 MATERIALS AND METHODS

### 15 *Study design and population*

16 We retrospectively analyzed all patients who underwent tumor embolization via the MHT and/or ILT for extra-axial skull-based tumors  
17 using the distal balloon protection technique at our institution between February 2010 and March 2023. Extra-axial skull-based tumors  
18 were defined as those attached to the dura mater located in the anterior fossa, cavernous sinus, sphenoid ridge, middle fossa, petroclival  
19 region, cerebellopontine angle, foramen magnum, or tentorium.

### 20 *Data collection*

21 Patient information such as age, sex, tumor location and pathology, as well as post-embolization complications was collected using medical  
22 records and pre- and postoperative CT and/or MRI. Neurological findings immediately after tumor embolization, head CT performed  
23 immediately after tumor embolization, and MRI performed within one week of embolization were used to ascertain the occurrence of  
24 complications. The extent of tumor resection was determined using MRIs taken within 3 months after surgery, and was divided into three  
25 grades: gross total resection, complete resection of the tumor mass; subtotal resection, complete resection of the tumor mass except for a  
26 part of tumor adjacent to critical structures and an invasion part into the dural sinuses; partial resection, other than gross total resection and  
27 subtotal resection. In addition, angiograms and embolization operative records were reviewed to determine the surgical instrument used,  
28 artery embolized, and embolization efficacy. The latter was determined by two endovascular surgeons based on postoperative ICA  
29 angiography findings of complete, partial, or no disappearance of tumor staining from the embolized artery. Finally, the operative records  
30 of tumor resection were reviewed to determine blood loss.

### 31 *Evaluation of postoperative cerebral infarction*

32 The presence of postoperative cerebral infarction was evaluated through an MRI conducted within one week following embolization.  
33 Cerebral infarction was diagnosed based on the presence of high-intensity areas observed on DWI. The number and size of the cerebral  
34 infarction were evaluated using the DWI grading scale, as outlined in previous reports: Grade A, no high-intensity areas; Grade B, minor  
35 high-intensity areas (five spots or less, with each spot  $\leq 10$  mm); Grade C, some small high-intensity areas (more than six spots, with each  
36 spot  $\leq 10$  mm); Grade D, large high-intensity areas (at least one spot  $> 10$  mm).<sup>14</sup>

### 37 *Surgical procedure of embolization using distal balloon protection*

38 The indication for tumor embolization was determined by a discussion between the neurosurgeon performing the tumor resection and the  
39 endovascular surgeon based on tumor angiographic findings. Tumor embolization was performed primarily for tumors that were large and  
40 rich in blood flow; it was expected that it would be difficult to devascularize the feeding artery during tumor resection.

41 Tumor embolization was performed one day before tumor resection. All embolization procedures were performed with 7Fr or 8Fr  
42 equivalent guide catheters (GCs). Initially, the GC was guided via the right femoral artery into the ICA, and a balloon was guided near the  
43 ophthalmic artery bifurcation. Next, microcatheter cannulation was attempted into the MHT or ILT. If cannulation was difficult, the  
44 microcatheter was guided as closely as possible to the orifice of the MHT or ILT. After the ICA was occluded with a balloon at the  
45 bifurcation of the ophthalmic artery, the embolic particles were injected through a microcatheter into the MHT or ILT (Fig. 1). During  
46 ICA occlusion, care was taken to ensure that the orifice of the ophthalmic artery was occluded to prevent the migration of embolic particles  
47 into the ophthalmic artery. The temporary occlusion of the ICA during embolization was limited to 10 minutes. After confirming that a  
48 sufficient embolic effect had been achieved, the embolic particles that had refluxed into the ICA were aspirated and removed using three  
49 methods.

50 The first method involved aspirating and removing the embolic particles from only the GC (GC method) (Fig. 2A). In this method, the  
51 embolic particles were aspirated and removed using the GC after embolization. In the GC method, aspiration from the GC was performed  
52 at least three times even if no embolic particles were identified; if embolic particles were identified, aspiration was repeated until no  
53 embolic particles were present.

54 The second method involved aspiration and removal of embolic particles using an aspiration catheter (AC) (AC method) (Fig. 2B). In  
55 this method, apart from the GC used for embolization, a 6Fr or 7Fr equivalent GC was guided via the left femoral artery into the common  
56 carotid artery and an AC was guided to the vicinity of the balloon to aspirate and remove the embolic particles that had refluxed into the  
57 ICA. Notably, when the ICA was occluded using a PercuSurge Guidewire (Medtronic, Dublin, Ireland), no additional GC was inserted. In

1 the AC method, similar to the GC method, aspiration from the AC was performed at least three times even if no embolic particles were  
 2 identified; if embolic particles were identified, aspiration was repeated until no embolic particles were present.  
 3 In the third method, after the embolic particles were aspirated and removed by the AC method, the cervical ICA was further occluded  
 4 with a balloon GC, the balloon on the distal side was deflated to allow the ICA to flow back, and the embolic particles were drained from  
 5 the ICA via the balloon GC (AC and flow reverse [FR] method) (Figs. 2C and 3). In the AC-and-FR methods, aspiration from the balloon  
 6 GC was completed once if no embolic particles were identified; however, if embolic particles were identified, aspiration was repeated until  
 7 no embolic particles were present.  
 8 In all three of these methods, aspiration was performed after embolization by using a 20 mL syringe, and continuous aspiration during  
 9 embolization was not performed.  
 10

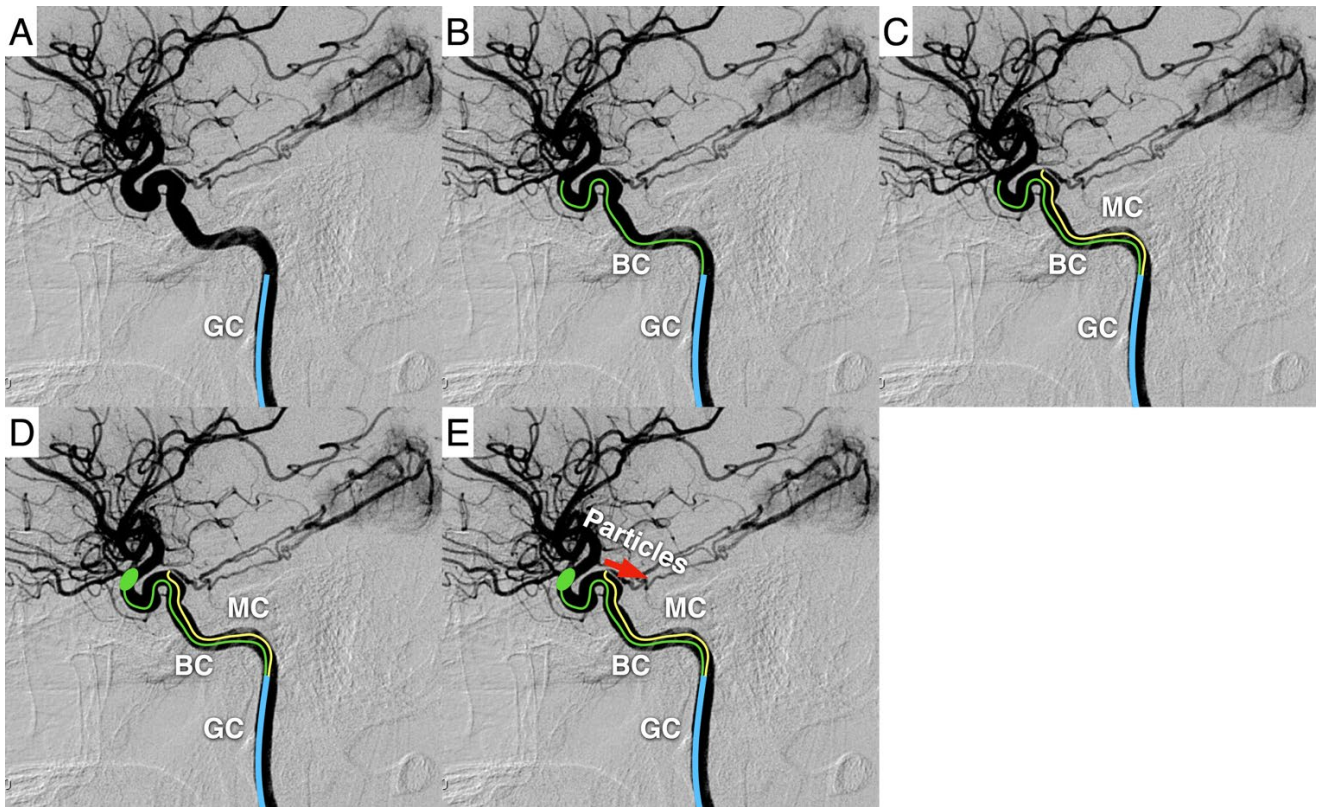

11  
 12 **FIG 1.** Schematic representation of tumor embolization using the distal balloon protection technique. First, a guide catheter is  
 13 placed in the internal carotid artery (A). Then, the balloon catheter is guided to the proximity of the bifurcation of the ophthalmic  
 14 artery (B). Next, a microcatheter is inserted into the meningo-hypophyseal trunk (MHT) or inferolateral trunk (ILT) (C). If  
 15 cannulation is difficult, the microcatheter is guided near the orifice of the MHT or ILT. The balloon is then inflated to occlude the  
 16 internal carotid and ophthalmic arteries (D). The embolic particles are injected from the microcatheter into the MHT or ILT (E).

17 Abbreviations: GC, guide catheter; BC, balloon catheter; MC, microcatheter.  
 18

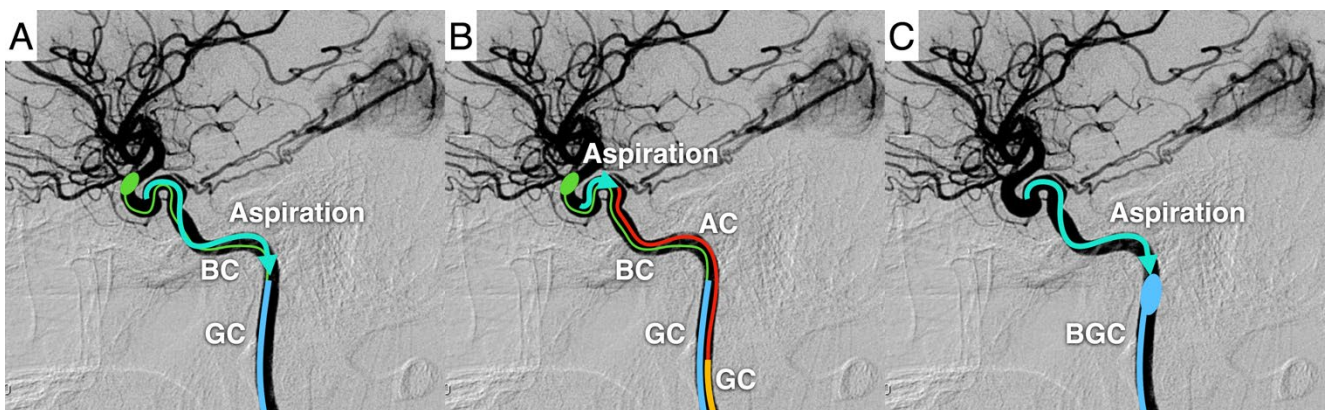

19  
 20 **FIG 2.** Schematic representation of aspiration and removal of embolic particle reflux into the internal carotid artery. In the guide  
 21 catheter method, embolic particles are aspirated and removed using the guide catheter while the internal carotid artery is  
 22 occluded with a balloon (A). In the aspiration catheter method, a guide catheter different from the one used for embolization is  
 23 placed in the common carotid artery (for convenience, the guide catheter is depicted in the internal carotid artery), and the  
 24 aspiration catheter is guided to the vicinity of the meningo-hypophyseal or inferolateral trunk to aspirate and remove embolic



1 particles (B). In the aspiration-catheter-and-flow-reverse method, after aspiration and removal of embolic particles by the  
2 aspiration method, the balloon guide catheter is inflated to reverse blood flow in the internal carotid artery to remove embolic  
3 particles more reliably (C).

4 Abbreviations: GC, guide catheter; BC, balloon catheter; AC, aspiration catheter; BGC, balloon guide catheter.

### 7 **Ethical consideration**

8 This retrospective study was approved by our institutional review board (protocol number: HM23-123). All patients provided written  
9 informed consent for treatment, and we applied an opt-out approach for participation.

10 In this study, three different embolic particles were employed (Embosphere [trisacryl gelatin microspheres] [Merit Medical Systems,  
11 Utah, United States], Ivalon [polyvinyl alcohol] [Ivalon Inc., California, United States], and Avitene [microfibrillar collagen] [ZERIA  
12 Pharmaceutical Co. Ltd., Tokyo, Japan]). Prior to the introduction of Embosphere, there were no approved embolic particles for tumor  
13 embolization in our country. Consequently, prior to the availability of Embosphere, Ivalon or Avitene were utilized as off-label embolic  
14 particles following the acquisition of written informed consent from the patient.  
15  
16

## 17 **RESULTS**

### 18 **Patient characteristics and surgical procedures**

19 A total of 21 tumor embolization procedures via the MHT and/or ILT with the distal balloon protection technique were performed on 19  
20 patients with extra-axial skull-based tumors during the period of this study. Two of the 19 patients underwent tumor embolization twice.  
21 The median age at surgery was 47 years (21–68 years), with 13 women and six men. Of the 19 patients, 17 had meningioma and two had  
22 solitary fibrous tumors. The meningioma subtypes were meningothelial in eight, angiomaticus in five, secretory in two, chordoid in one,  
23 and difficult to classify (diagnosed as WHO gr. 1 equivalent) in one patient. The tumor attachment sites were the petroclival in 13,  
24 falcotentorial in three, sphenoid ridge in two, and CPA in one patient.

25 A total of 19 MHTs and six ILTs were embolized using 21 embolization procedures. Of these embolized arteries, eight MHTs (42.1%)  
26 and one ILT (16.7%) were successfully cannulated using microcatheters. Particles are used as the embolic material in all surgeries;  
27 Embosphere (100–300  $\mu\text{m}$  or 300–500  $\mu\text{m}$ ) (trisacryl gelatin microspheres) (Merit Medical Systems, Utah, United States) were used in 12  
28 embolization procedures, Ivalon (polyvinyl alcohol) (Ivalon Inc., California, United States) were used in five, and Avitene (microfibrillar  
29 collagen) (ZERIA Pharmaceutical Co. Ltd., Tokyo, Japan) were used in four. Avitene used in this study was supplied in powder form, and  
30 a pinch of Avitene was dissolved in 20 mL of contrast medium for the embolization procedure. As for the method of aspiration and removal  
31 of embolic particles, the GC method was employed in three embolization procedures, the AC method in six, and the AC-and-FR method  
32 in 12 (Tables 1 and 2).

### 34 **Efficacy and complications of embolization**

35 Regarding the efficacy of tumor embolization, complete disappearance of tumor stain was achieved in 14 of 19 MHTs (73.7%), and partial  
36 disappearance in the remaining five (26.3%); complete disappearance of tumor stain was observed in four of six ILTs (66.7%), and partial  
37 disappearance in the remaining two (33.3%). An embolic effect was observed in all cases. When the embolization effect was examined  
38 based on whether the microcatheter could be cannulated into the ILT or MHT, the complete disappearance of the tumor stain was confirmed  
39 in six of the nine arteries (66.7%) that could be cannulated and in 12 of the 16 arteries (75.0%) that could not (Table 1).

40 Two of the 21 embolization procedures (9.5%) exhibited symptomatic complications associated with embolization of the ILT: transient  
41 hemiparalysis associated with embolic cerebral infarction in one case and visual field disturbance due to central retinal artery occlusion in  
42 the other. Permanent sequelae were observed in only one case (4.8%) of the above-mentioned visual field disturbance (Table 1).

43 Regarding the postoperative imaging evaluation, all cases underwent CT immediately after embolization, and 16 of the 21 cases  
44 underwent MRI within one week after embolization. Postoperative MRI was performed in one of three cases using the GC method, in four  
45 of six cases using the AC method, and in 11 of 12 cases using the AC-and-FR method. Postoperative CT revealed no complications in any  
46 of the cases. However, MRI confirmed embolic cerebral infarction in 11 of 16 cases (68.8%): in one case (100%) using the GC method,  
47 two of four cases (50.0%) using the AC method, and eight of 11 cases (72.7%) using the AC-and-FR method. The details of the DWI  
48 grading scale were the following: Grade A in five patients (31.3%), Grade B in two (12.5%), Grade C in eight (50.0%), and Grade D in  
49 one (6.3%). Of these 11 cerebral infarctions, one case using the GC method had transient hemiparalysis as described above, whereas 10  
50 cases using the AC and AC-and-FR methods were asymptomatic. According to the DWI grading scale, a Grade D case experienced  
51 transient paralysis, whereas 10 cases in Grades B and C were asymptomatic. No cranial nerve ischemia occurred in any patient.

52 In one of the 12 cases using the AC-and-FR method, in which the ILT was embolized, occlusion of the central retinal artery occurred,  
53 and the embolic particles were thought to have migrated into the central retinal artery through the anastomosis between the ILT and  
54 ophthalmic artery, or the remaining embolic particles in the ICA migrated directly into the central retinal artery.

### 56 **Tumor resection**

1 Tumor resection was successfully performed in all cases. Gross total resection was achieved in two cases, subtotal resection in nine cases,  
2 and partial resection in 10 cases. The median blood loss during surgical resection was 212 mL (30–848 mL). There were no cases in which  
3 tumor resection was interrupted due to difficulty in hemostasis. No major surgery-related complications or deaths occurred.

4  
5 **Representative case (Surgical no. 10, Tables 1 and 2)**

6 A man in his 30s presented symptoms including headache, visual field disturbance, and cognitive dysfunction. MRI revealed an extra-  
7 axial skull base tumor with an attachment from the falx to the right cerebellar tent (Fig. 3A). Preoperative ICA angiography showed a  
8 prominent tumor stain from the right MHT (Fig. 3B), and tumor embolization from the MHT with AC-and-FR method was performed one  
9 day before tumor resection.

10 To begin the embolization procedure, we initially guided a 7Fr balloon GC (OPTIMO EPD, Tokai Medical Products, Aichi, Japan)  
11 into the right ICA via the right femoral artery. Next, a sheathless 5Fr GC (ASAHI FUBUKI Dilator kit, ASAHI INTECC CO. LTD., Aichi,  
12 Japan) was guided via the left femoral artery to the right common carotid artery for particle aspiration.

13 Efforts were made to cannulate the microcatheter (Excelsior 1018, Stryker, Michigan, United States) and microguidewire  
14 (GLIDEWIRE GT Guidewire 0.016-inch double angle, Terumo Interventional Systems, New Jersey, United States) into the MHT via a  
15 7Fr balloon GC, but these attempts were unsuccessful. Therefore, the apex of the microcatheter was redirected to the orifice of the MHT,  
16 and the embolic particles (Embosphere 300–500 $\mu$ m, Merit Medical Systems, Utah, United States) were injected toward the orifice after  
17 the temporal occlusion of the ICA at the origin of the ophthalmic artery was achieved using a microballoon catheter (MAGIC B1, Balt,  
18 Montmorency, France) through the 7Fr balloon GC (Fig. 3C).

19 Immediately following embolization, the AC (Thrombuster, Kaneka Medix Corporation, Osaka, Japan) was guided through a sheathless  
20 5Fr GC to the vicinity of the balloon to aspirate and remove the remaining embolic particles in the ICA. In addition, the balloon GC was  
21 inflated to obstruct blood flow at the cervical ICA, and the distal microballoon catheter was deflated to reverse the blood flow in the ICA  
22 and drain the remaining embolic particles out of the body through the balloon GC (Fig. 3D). Finally, the complete disappearance of tumor  
23 stain from the MHT was confirmed (Fig. 3E). There were no new neurological symptoms following embolization, and postoperative MRI  
24 revealed no evidence of embolic infarction (Fig. 3F).

25 The tumor was resected using a posterior interhemispheric approach (operation time: 949 minutes, blood loss: 498 mL), and the patient  
26 was discharged without any postoperative complications. The pathological diagnosis confirmed the presence of a solitary fibrous tumor.  
27

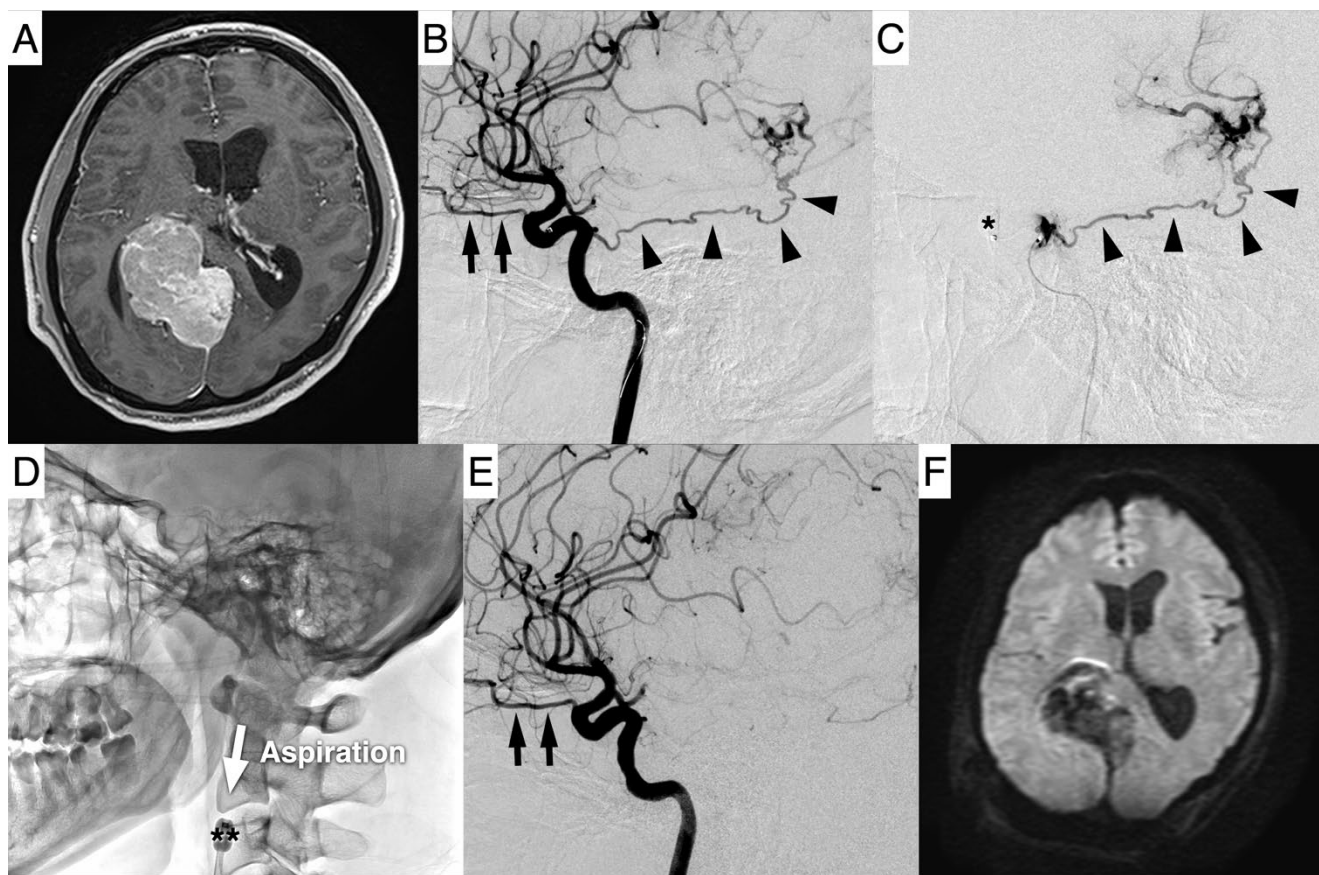

28  
29 **FIG 3.** A case of tumor embolization via the MHT using the distal balloon protection technique. Preoperative tumor embolization  
30 was performed for right falcotentorial meningioma through the right meningohypophyseal trunk (MHT) (A and B). In this case, the  
31 microcatheter was guided to the vicinity of the orifice of the MHT because cannulation of the microcatheter into the MHT was not  
32 possible (C). Next, the internal carotid artery (ICA) and ophthalmic artery were occluded with a balloon (C), and the MHT was  
33 embolized with embolic particles. After embolization, the aspiration catheter was guided to the vicinity of the MHT to aspirate  
34 and remove the embolic particles. This was followed by inflating the balloon-guide catheter and deflating the balloon catheter to

1 reverse blood flow in the ICA to remove the embolic particles (D). Finally, complete embolization of the MHT was confirmed (E).  
2 Postoperative magnetic resonance imaging showed no embolic cerebral infarction (F).

3 Black arrow, ophthalmic artery; black arrowhead, meningohypophyseal trunk; single asterisk, balloon catheter; double asterisk,  
4 balloon guide catheter.

## 5 DISCUSSION

6 To our knowledge, this is the first study to evaluate the efficacy and safety of tumor embolization via the MHT and ILT using the distal  
7 balloon protection technique. The distal balloon protection technique presented in this study can embolize essentially all MHTs and ILTs  
8 because cannulation into these arteries is not required, and the incidence of permanent complications was 4.8%. Only 32.1% of MHT and  
9 20% of ILT can be embolized when catheter cannulation is prioritized in conventional surgery, whereas complications occur in 22.1% of  
10 MHT embolization and 13.3% of ILT embolization when aggressive embolization is performed.<sup>9, 10</sup> The embolization of the MHT and  
11 ILT using the distal balloon protection technique greatly expanded the surgical target compared with conventional methods.

### 12 13 ***Embolization efficacy***

14 The results of this study showed that tumor embolization effects were observed after all surgeries. Even when microcatheter cannulation  
15 into the MHT or ILT was difficult, tumor stains completely disappeared in 75% of the cases, suggesting that even without cannulation,  
16 injecting embolic particles toward the target artery provides a sufficient tumor embolization effect. We have named the tumor embolization  
17 technique with distal balloon protection the “para-para method” (from the Japanese word “para-para,” which means sprinkle) because of  
18 sprinkling the embolic particles into the tumor. Although safety issues remain, the para-para method presented here allows tumor  
19 embolization via all MHTs and ILTs; this is expected to significantly expand the indications for tumor embolization via MHT and ILT.  
20 Surgical instruments developed in recent years may facilitate the selection of these arteries. Arterial embolization after selecting these  
21 arteries is the first choice; however, tumor embolization using the para-para method is useful as a second option when these arteries cannot  
22 be selected.

23 In the present study, gross total resection was achieved in only two cases. Since tumor embolization in this study was performed on  
24 tumors with large and abundant blood flow, the tumor part adjacent to the brain stem, eloquent cerebral cortex, cranial nerves, and critical  
25 arteries and veins, and that invading the dural sinuses tended to be unresectable. Conversely, these results indicate that tumors with high  
26 risk of complications were primarily included in the present study. Since tumor resection rates are determined by various factors, it is  
27 difficult to evaluate the efficacy of tumor embolization based solely on tumor resection rates. On the other hand, the fact that there were  
28 no cases in which hemostasis was difficult to achieve during resection may reflect the effectiveness of tumor embolization.

### 29 30 ***Methods for aspiration and removal of embolic particles and risk of embolic cerebral infarction***

31 Three methods were used to remove the embolic particles in this study; however, only the GC method caused symptomatic embolic  
32 cerebral infarction (Grade D on the DWI grading scale). This is presumably because the GC method can only aspirate blood around the  
33 GC, and thus cannot sufficiently aspirate embolic particles. In contrast, the AC and AC-and-FR methods did not cause symptomatic  
34 cerebral infarction. In the course of employing these methods, only minor cerebral infarctions of Grade B or C on the DWI grading scale  
35 were observed. This may be because the aspiration of blood in the vicinity of the orifice of the MHT and ILT allowed for sufficient  
36 aspiration and removal of embolic particles that refluxed into the ICA. It should be noted, however, that a high frequency of postoperative  
37 embolic cerebral infarction has been observed even when the AC or AC-and-FR method was used. Embolization using the para-para  
38 method should be considered as an alternative when direct catheterization into the MHT and ILT are difficult. Compared to the AC method,  
39 the AC-and-FR method is presumed to be more reliable for aspirating and removing embolic particles given the nature of the procedure.  
40 Since embolic infarction was confirmed in more than half of the cases in the present study, it would be preferable to use the AC and FR  
41 method, which more reliably removes embolic particles. In addition, distal access catheters possessing the same capability as aspiration  
42 catheters have been developed in recent times. Although the present study did not include a case with a distal access catheter, it is likely  
43 that a coaxial system with a distal access catheter could be used to aspirate embolic particles in a similar manner through a single access  
44 route.

### 45 46 ***Risk of complications other than cerebral infarction***

47 In addition to the aforementioned embolic cerebral infarction, other complications of MHT and ILT have been reported, including  
48 occlusion of the vasa nervorum of the cranial nerves and the risk of migration of embolic particles into normal arteries via dangerous  
49 anastomoses.<sup>4, 7, 8, 10</sup>

50 Although no occlusion of the vasa nervorum occurred in this study, the choice of embolic material is known to be important for avoiding  
51 occlusion.<sup>4, 5, 7, 8, 10</sup> The vasa nervorum diameter is usually less than 100–150  $\mu\text{m}$ ,<sup>5, 15</sup> and avoiding the use of liquid embolic material while  
52 using embolic particles larger than 100  $\mu\text{m}$  is important to avoid its occlusion.<sup>5, 8</sup> Conversely, tumor embolization is more effective when  
53 smaller-diameter embolic particles are used, which can reach the tumor more easily.<sup>7</sup> Considering that tumor embolization is only an  
54 adjunctive therapy for tumor removal, it is necessary to avoid complications as much as possible. Although the extent of tumor stain and  
55 the location of tumor-feeding arteries can vary, it seemed reasonable to select embolic particles at least larger than the Embosphere 100–  
56 300  $\mu\text{m}$  (Merit Medical Systems, Utah, United States) to balance the benefits obtained and the risk of complications, given that no cranial  
57 nerve disturbance occurred in this study.

1 In addition to the vasa nervorum, dangerous anastomosis should also be noted during embolization of the MHT and ILT.<sup>8</sup> Particular  
2 attention should be paid to the anastomosis with the ophthalmic artery via the deep recurrent ophthalmic artery during embolization of the  
3 ILT.<sup>8</sup> In the present study, occlusion of the central retinal artery occurred in one patient. Although it is conceivable that the remaining  
4 embolic particles in the ICA migrated directly to the central retinal artery, this dangerous anastomosis could have been the cause. In the  
5 aforementioned case, the microcatheter could not be cannulated into the ILT; therefore, the ILT could not be fully evaluated. Given the  
6 magnitude of the impact of visual field defects, it may be appropriate to avoid embolization from the ILT if the dangerous anastomosis  
7 cannot be adequately evaluated. Furthermore, since dangerous anastomoses that were not initially identified may be found after  
8 embolization,<sup>7</sup> it is necessary to carefully consider the surgical indications for ILT embolization, especially considering the risk of  
9 blindness and the benefits of embolization. In the present study, the balloon was inflated at the ophthalmic artery bifurcation to prevent  
10 the embolic particles from migrating into the ICA via the ophthalmic artery if they flowed back into the external carotid artery; however,  
11 since ICA cavernous portion have various dangerous anastomosis, inflating the balloon immediately distal to the artery to be embolized  
12 may further reduce the risk of the embolic particles migrating into the dangerous anastomosis.

13  
14 ***Appropriateness of MHT and ILT embolization***

15 It is difficult to rigorously evaluate the clinical efficacy of tumor embolization because evaluating individual tumors identically is  
16 challenging, and studies on tumor embolization are usually strongly influenced by neurosurgeon and endovascular surgeon biases.<sup>10</sup>  
17 Therefore, tumor embolization, especially from arteries posing a risk for complications, should be decided upon carefully. The decision to  
18 perform tumor embolization in this study was ultimately made through discussion between the neurosurgeon and the endovascular surgeon;  
19 however, the basic selection was focused on tumors with large, abundant blood flow and difficulty in feeding artery devascularization.  
20 Consequently, tumors with rich blood flow, such as angiomatous meningiomas, chordoid meningiomas, and solitary fibrous tumors, were  
21 frequently embolized in this study. Although these hemorrhagic tumors accounted for approximately half of the cases in the present study,  
22 the median amount of bleeding was only 212 mL, which is less than that in previous reports,<sup>7</sup> suggesting that tumor embolization was  
23 sufficiently effective.

24 There may be some controversy regarding the 4.8% permanent complication rate and high frequency of postoperative embolic  
25 infarction shown in this study. Preoperative embolization is only an adjunctive procedure to tumor resection, and a lower complication  
26 rate will be required. On the other hand, given the difficulty of resecting skull-based tumors, the para-para method may be viewed favorably  
27 by neurosurgeons performing tumor resections because it may reduce the risk of surgical complications,<sup>13</sup> increase the resection rate,<sup>16</sup> and  
28 improve the progression-free survival.<sup>17</sup> Even today, surgical complications and postoperative neurological deficits related to tumor  
29 resection are common, particularly in petroclival meningiomas, which often have feeders branching from the MHT and ILT.<sup>18</sup> The  
30 worsening of cranial nerve deficits after tumor resection has been reported to occur in 23% to 76% of patients,<sup>18-25</sup> and the worsening of  
31 extremity weakness occurs in approximately 10%.<sup>18,26</sup> Furthermore, even in a series in which the gross total resection rate was kept as low  
32 as 15.4% via combination with postoperative radiation therapy, as many as 16.9% of patients had severe complications due to stroke or  
33 intracranial hematoma after tumor resection.<sup>18</sup> These reports indicate that the removal of petroclival meningioma, which is often the subject  
34 of the para-para method, is still challenging. Tumor embolization using the para-para method should be considered as a salvage technique  
35 when direct catheterization to the MHT or ILT is difficult, after weighing the complications of tumor resection against those of the para-  
36 para method.

37  
38 ***Limitations***

39 This study was conducted at a single institution and the number of cases was small. In addition, several types of surgical instruments and  
40 embolic particles were used, and the procedure was not strictly standardized, as it included three different methods of aspiration and  
41 removal of embolic particles. Furthermore, postoperative MRIs were taken after tumor removal in many cases, which raises the issue of  
42 accuracy in assessing cerebral infarction after tumor embolization. A more accurate assessment of the efficacy and risk of complications  
43 of the para-para method would require the evaluation of a larger number of patients undergoing embolization using a uniform procedure.  
44 In addition, a comparison with patients who underwent tumor removal and did not undergo embolization would be warranted for future  
45 studies to determine the efficacy of tumor embolization.

46  
47  
48  
49  
50  
51  
52  
53  
54  
55  
56  
57  
58  
59  
60

1 **Table 1:** Patient details.

| Surgical no. | Age | Sex | Diagnosis                 | Location | Target | Cannulation | Efficacy of embolization | Aspiration method | Symptomatic complication |
|--------------|-----|-----|---------------------------|----------|--------|-------------|--------------------------|-------------------|--------------------------|
| 1            | 47  | F   | Meningioma (WHO gr. 1)    | FT       | Lt MHT | Possible    | Complete                 | AC                | None                     |
| 2            | 47  | F   | Meningioma (WHO gr. 1)    | FT       | Rt MHT | Possible    | Complete                 | AC                | None                     |
| 3            | 42  | F   | Meningothelial meningioma | SR       | Lt ILT | Impossible  | Partial                  | AC                | None                     |
| 4            | 49  | M   | Meningothelial meningioma | PC       | Lt MHT | Impossible  | Complete                 | AC                | None                     |
| 5            | 27  | F   | Solitary fibrous tumor    | CPA      | Lt MHT | Impossible  | Complete                 | AC                | None                     |
| 6            | 63  | M   | Meningothelial meningioma | PC       | Lt MHT | Impossible  | Complete                 | GC                | None                     |
| 7            | 45  | F   | Meningothelial meningioma | PC       | Lt MHT | Impossible  | Complete                 | GC                | None                     |
| 8            | 62  | F   | Meningothelial meningioma | PC       | Rt ILT | Impossible  | Complete                 | GC                | Transient hemiparesis    |
| 9            | 67  | F   | Angiomatous meningioma    | PC       | Lt MHT | Impossible  | Complete                 | AC                | None                     |
|              |     |     |                           |          | Rt MHT | Impossible  | Complete                 |                   |                          |
|              |     |     |                           |          | Lt ILT | Impossible  | Partial                  |                   |                          |
| 10           | 37  | M   | Solitary fibrous tumor    | FT       | Rt MHT | Impossible  | Complete                 | AC and FR         | None                     |
| 11           | 50  | F   | Meningothelial meningioma | PC       | Lt MHT | Impossible  | Complete                 | AC and FR         | None                     |
| 12           | 31  | F   | Solitary fibrous tumor    | CPA      | Lt ILT | Impossible  | Complete                 | AC and FR         | None                     |
| 13           | 21  | M   | Chordoid meningioma       | PC       | Lt ILT | Possible    | Complete                 | AC and FR         | None                     |
|              |     |     |                           |          | Lt MHT | Possible    | Complete                 |                   |                          |
| 14           | 26  | F   | Meningothelial meningioma | PC       | Lt ILT | Impossible  | Complete                 | AC and FR         | Visual field disturbance |
| 15           | 68  | M   | Angiomatous meningioma    | PC       | Rt MHT | Possible    | Partial                  | AC and FR         | None                     |
| 16           | 28  | F   | Angiomatous meningioma    | SR       | Rt MHT | Possible    | Partial                  | AC and FR         | None                     |
| 17           | 66  | F   | Angiomatous meningioma    | PC       | Lt MHT | Impossible  | Complete                 | AC and FR         | None                     |
| 18           | 62  | F   | Meningothelial meningioma | FT       | Lt MHT | Impossible  | Partial                  | AC and FR         | None                     |
| 19           | 47  | F   | Secretory meningioma      | PC       | Lt MHT | Possible    | Complete                 | AC and FR         | None                     |
| 20           | 36  | M   | Angiomatous meningioma    | PC       | Rt MHT | Possible    | Partial                  | AC and FR         | None                     |
| 21           | 68  | F   | Secretory meningioma      | PC       | Lt MHT | Impossible  | Partial                  | AC and FR         | None                     |
|              |     |     |                           |          | Rt MHT | Possible    | Complete                 |                   |                          |

2 Abbreviations: F, female; M, male; FT, falcotentorial; SR, sphenoid ridge; PC, petroclival; CPA, cerebellopontine angle; Lt, left;  
3 Rt, right; MHT, meningohypophyseal trunk; ILT, inferolateral trunk; AC, aspiration catheter method; GC, guide catheter method;  
4 AC and FR, aspiration-catheter-and-flow-reverse method

5  
6  
7  
8  
9  
10  
11  
12  
13



1 **Table 2:** Surgical instrument details.

| Surgical no. | GC for embolization        | Distal protection         | MC              | GC for aspiration          | AC                         | Embollic particle     |
|--------------|----------------------------|---------------------------|-----------------|----------------------------|----------------------------|-----------------------|
| 1            | 5Fr Shuttle Guiding Sheath | MAGIC B2                  | Excelsior 1018  | 5Fr Shuttle Guiding Sheath | Thrombuster                | Ivalon                |
| 2            | 5Fr Shuttle Guiding Sheath | MAGIC B2                  | Excelsior 1018  | 5Fr Shuttle Guiding Sheath | Thrombuster                | Ivalon                |
| 3            | 7Fr Brite Tip SHEATH       | MAGIC B2                  | Excelsior 1018  | None                       | 4Fr catheter for diagnosis | Ivalon                |
| 4            | 5Fr Shuttle Guiding Sheath | PercuSurge                | Excelsior 1018  | None                       | Eliminate                  | Ivalon                |
| 5            | 6Fr Shuttle Guiding Sheath | PercuSurge                | Rapid Transit   | None                       | Eliminate                  | Avitene               |
| 6            | 5Fr FUBUKI Long Sheath     | MAGIC B2                  | Excelsior 1018  | None                       | None                       | Avitene               |
| 7            | 8Fr OPTIMO EPD             | MAGIC B2                  | Renegade-18     | None                       | None                       | Avitene               |
| 8            | 8Fr OPTIMO EPD             | MAGIC B2                  | Rapid Transit   | None                       | None                       | Avitene               |
| 9            | 5Fr FUBUKI Long Sheath     | MAGIC B1                  | Excelsior 1018  | 5Fr FUBUKI Long Sheath     | Thrombuster                | Ivalon                |
| 10           | 7Fr OPTIMO EPD             | MAGIC B1                  | Excelsior 1018  | 5Fr FUBUKI Long Sheath     | Thrombuster                | Embosphere 300-500 µm |
| 11           | 7Fr OPTIMO EPD             | MAGIC B1                  | Excelsior SL-10 | 5Fr FUBUKI Long Sheath     | Thrombuster                | Embosphere 100-300 µm |
| 12           | 7Fr OPTIMO EPD             | MAGIC B1                  | Excelsior 1018  | 5Fr FUBUKI Long Sheath     | Thrombuster                | Embosphere 300-500 µm |
| 13           | 7Fr OPTIMO EPD             | MAGIC B1                  | Excelsior SL-10 | 5Fr FUBUKI Long Sheath     | Thrombuster                | Embosphere 100-300 µm |
| 14           | 7Fr OPTIMO EPD             | MAGIC B1                  | Excelsior 1018  | 5Fr FUBUKI Long Sheath     | Thrombuster                | Embosphere 300-500 µm |
| 15           | 7Fr OPTIMO EPD             | MAGIC B1                  | Rapid Transit   | 5Fr FUBUKI Long Sheath     | 4.2Fr FUBUKI               | Embosphere 300-500 µm |
| 16           | 7Fr OPTIMO EPD             | MAGIC B1                  | Rapid Transit   | 6Fr ROADMASTER             | 4.2Fr FUBUKI               | Embosphere 300-500 µm |
| 17           | 7Fr OPTIMO EPD             | MAGIC B1                  | Excelsior 1018  | 5Fr FUBUKI Long Sheath     | Thrombuster                | Embosphere 100-300 µm |
| 18           | 8Fr OPTIMO EPD             | MAGIC B1                  | Excelsior 1018  | 5Fr FUBUKI Long Sheath     | Thrombuster                | Embosphere 100-300 µm |
| 19           | 8Fr FlowGate2              | MAGIC B1                  | Headway         | 5Fr FUBUKI Long Sheath     | 4.2Fr FUBUKI               | Embosphere 100-300 µm |
| 20           | 7Fr OPTIMO EPD             | MAGIC B1                  | Excelsior 1018  | 7Fr ROADMASTER             | Thrombuster                | Embosphere 100-300 µm |
| 21           | 8Fr OPTIMO EPD             | TransForm Super Compliant | Excelsior 1018  | 6Fr ROADMASTER             | Thrombuster                | Embosphere 300-500 µm |

2 Abbreviations: GC, guide catheter; MC, microcatheter; AC, aspiration catheter

3

4 **CONCLUSIONS**

5 Tumor embolization from the MHT and ILT remains challenging and should be performed in selected cases. However, the use of the para-  
6 para method is expected to expand the indications.

7

8 **ACKNOWLEDGMENTS**

9 The authors would like to thank Editage ([www.editage.com](http://www.editage.com)) for the English language editing.

10

## 2 REFERENCES

- 3 1. Adachi K, Hasegawa M, Hayakawa M, et al. Susceptibility-weighted imaging of deep venous congestion in petroclival meningioma. *World Neurosurg* 2019;122:e20-e31. DOI:10.1016/j.wneu.2018.08.218
- 4 2. Adachi K, Hayakawa M, Sadato A, et al. Modified balloon protection technique for preoperative embolization of feeder arteries from internal carotid artery branches to skull-base tumor: Technical note. *J Neurol Surg A Cent Eur Neurosurg* 2016;77:161-66. DOI:10.1055/s-0034-1543961
- 5 3. Akimoto T, Ohtake M, Miyake S, et al. Preoperative tumor embolization prolongs time to recurrence of meningiomas: a retrospective propensity-matched analysis. *J Neurointerv Surg* 2023;15:814-20. DOI:10.1136/neurintsurg-2022-019080
- 6 4. Hirohata M, Abe T, Morimitsu H, et al. Preoperative selective internal carotid artery dural branch embolisation for petroclival meningiomas. *Neuroradiology* 2003;45:656-60. DOI:10.1007/s00234-003-1056-3
- 7 5. Manelfe C, Lasjaunias P, Ruscalleda J. Preoperative embolization of intracranial meningiomas. *AJNR Am J Neuroradiol* 1986;7:963-72
- 8 6. Okada H, Hashimoto T, Tanaka Y, et al. Embolization of skull base meningiomas with embosphere microspheres: factors predicting treatment response and evaluation of complications. *World Neurosurg* 2022;162:e178-e86. DOI:10.1016/j.wneu.2022.02.118
- 9 7. Raz E, Cavalcanti DD, Sen C, et al. Tumor embolization through meningohypophyseal and inferolateral trunks is safe and effective. *AJNR Am J Neuroradiol* 2022;43:1142-47. DOI:10.3174/ajnr.A7579
- 10 8. Robinson DH, Song JK, Eskridge JM. Embolization of meningohypophyseal and inferolateral branches of the cavernous internal carotid artery. *AJNR Am J Neuroradiol* 1999;20:1061-67
- 11 9. Rosen CL, Ammerman JM, Sekhar LN, et al. Outcome analysis of preoperative embolization in cranial base surgery. *Acta Neurochir (Wien)* 2002;144:1157-64. DOI:10.1007/s00701-002-0965-y
- 12 10. Waldron JS, Sughrue ME, Hetsch SW, et al. Embolization of skull base meningiomas and feeding vessels arising from the internal carotid circulation. *Neurosurgery* 2011;68:162-69. DOI:10.1227/NEU.0b013e3181fe2de9
- 13 11. Yoon N, Shah A, Couldwell WT, et al. Preoperative embolization of skull base meningiomas: current indications, techniques, and pearls for complication avoidance. *Neurosurg Focus* 2018;44:E5. DOI:10.3171/2018.1.FOCUS17686
- 14 12. Chen L, Li DH, Lu YH, et al. Preoperative embolization versus direct surgery of meningiomas: a meta-analysis. *World Neurosurg* 2019;128:62-68. DOI:10.1016/j.wneu.2019.02.223
- 15 13. Ilyas A, Przybylowski C, Chen CJ, et al. Preoperative embolization of skull base meningiomas: a systematic review. *J Clin Neurosci* 2019;59:259-64. DOI:10.1016/j.jocn.2018.06.022
- 16 14. Higashiguchi S, Sadato A, Nakahara I, et al. Reduction of thromboembolic complications during the endovascular treatment of unruptured aneurysms by employing a tailored dual antiplatelet regimen using aspirin and prasugrel. *J Neurointerv Surg* 2021;13:1044-48. DOI:10.1136/neurintsurg-2020-016994
- 17 15. Latchaw RE. Preoperative intracranial meningioma embolization: technical considerations affecting the risk-to-benefit ratio. *AJNR Am J Neuroradiol* 1993;14:583-86
- 18 16. Teasdale E, Patterson J, McLellan D, et al. Subselective preoperative embolization for meningiomas. a radiological and pathological assessment. *J Neurosurg* 1984;60:506-11. DOI:10.3171/jns.1984.60.3.0506
- 19 17. Macpherson P. The value of pre-operative embolisation of meningioma estimated subjectively and objectively. *Neuroradiology* 1991;33:334-37. DOI:10.1007/BF00587818
- 20 18. Nguyen MP, Morshed RA, Cheung SW, et al. Postoperative Complications and Neurological Deficits After Petroclival Region Meningioma Resection: A Case Series. *Oper Neurosurg (Hagerstown)* 2023;25:251-59. DOI:10.1227/ons.0000000000000791
- 21 19. Almefty R, Dunn IF, Pravdenkova S, et al. True petroclival meningiomas: results of surgical management. *J Neurosurg* 2014;120:40-51. DOI:10.3171/2013.8.JNS13535
- 22 20. Little KM, Friedman AH, Sampson JH, et al. Surgical management of petroclival meningiomas: defining resection goals based on risk of neurological morbidity and tumor recurrence rates in 137 patients. *Neurosurgery* 2005;56:546-59. DOI:10.1227/01.neu.0000153906.12640.62
- 23 21. Lang DA, Neil-Dwyer G, Garfield J. Outcome after complex neurosurgery: the caregiver's burden is forgotten. *J Neurosurg* 1999;91:359-63. DOI:10.3171/jns.1999.91.3.0359
- 24 22. Nanda A, Javalkar V, Banerjee AD. Petroclival meningiomas: study on outcomes, complications and recurrence rates. *J Neurosurg* 2011;114:1268-77. DOI:10.3171/2010.11.JNS10326
- 25 23. Wagner A, Alraun M, Kahlig V, et al. Surgical and functional outcome after resection of 64 petroclival meningiomas. *Cancers (Basel)* 2022;14. DOI:10.3390/cancers14184517
- 26 24. Xu F, Karampelas I, Megerian CA, et al. Petroclival meningiomas: an update on surgical approaches, decision making, and treatment results. *Neurosurg Focus* 2013;35:E11. DOI:10.3171/2013.9.FOCUS13319
- 27 25. Erkmen K, Pravdenkova S, Al-Mefty O. Surgical management of petroclival meningiomas: factors determining the choice of approach. *Neurosurg Focus* 2005;19:E7. DOI:10.3171/foc.2005.19.2.8
- 28 26. Diluna ML, Bulsara KR. Surgery for petroclival meningiomas: a comprehensive review of outcomes in the skull base surgery era. *Skull Base* 2010;20:337-42. DOI:10.1055/s-0030-1253581
